# Supplementary material for: Polyoxometalate-based supramolecular architecture constructed from a purely inorganic 1D chain and a metal–organic layer with efficient catalytic activity
Source: Royal Society of Chemistry journal article supplement (doi:10.1039/c5ra23830g), 2016-01-01
Supplement: c5ra23830g1.pdf [file c5ra23830g1.pdf]

## Supporting information

### **Polyoxometalate-Based Supramolecular Architecture Constructed from Purely Inorganic 1D Chain and Metal-Organic Layers with Efficient Catalytic Activity**

Chun-Jie Wang,<sup>a</sup> Ting-Ting Wang,<sup>a</sup> Qing Lan,<sup>a</sup> Shuang Yao,<sup>\*,b</sup> Hong-Li Wu,<sup>a</sup> Yang-Yang Zhou,<sup>b</sup> Zhi-Ming Zhang<sup>\*,a</sup> En-Bo Wang<sup>a</sup>

*<sup>a</sup>Key Laboratory of Polyoxometalate Science of Ministry of Education, Department of Chemistry, Northeast Normal University, Changchun, Jilin 130024, PR China.*

*<sup>b</sup>College of Chemistry and Environmental Engineering, Changchun University of Science and Technology, Changchun, Jilin 130022, PR. China.*

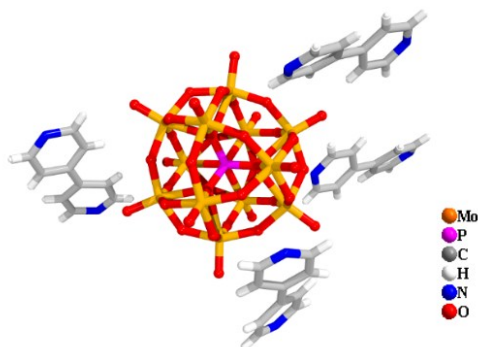

**Fig. S1** The structure of  $(4,4\text{-bpy})_4[\text{H}_3\text{PMo}_{12}\text{O}_{40}]$  composed of one  $[\text{PMo}_{12}\text{O}_{40}]$  anion and four 4,4-bpy ligands.

**Table S1** The crystal data and structure refinement of  $(4,4\text{-bpy})_4[\text{H}_3\text{PMo}_{12}\text{O}_{40}]\cdot 5\text{H}_2\text{O}$

| Compound $(4,4\text{-bpy})_4[\text{H}_3\text{PMo}_{12}\text{O}_{40}]\cdot 5\text{H}_2\text{O}$                      |                                                                           |
|---------------------------------------------------------------------------------------------------------------------|---------------------------------------------------------------------------|
| Formula                                                                                                             | $\text{C}_{40}\text{H}_{42}\text{Mo}_{12}\text{N}_8\text{O}_{45}\text{P}$ |
| $T$ (K)                                                                                                             | 296(2)                                                                    |
| $F_w$                                                                                                               | 2537.07                                                                   |
| Crystal system                                                                                                      | monoclinic                                                                |
| Space group                                                                                                         | $P2(1)/c$                                                                 |
| $a$ (Å)                                                                                                             | 18.7596(10)                                                               |
| $b$ (Å)                                                                                                             | 14.0406(8)                                                                |
| $c$ (Å)                                                                                                             | 26.5614(14)                                                               |
| $\beta/^\circ$                                                                                                      | 105.4350(10)                                                              |
| $V$ (Å <sup>3</sup> )                                                                                               | 6743.8(6)                                                                 |
| $Z$                                                                                                                 | 4.00                                                                      |
| $\mu$ (mm <sup>-1</sup> )                                                                                           | 2.284                                                                     |
| $\lambda$ (Å)                                                                                                       | 0.71073                                                                   |
| $R_1, wR_2$ [ $I > 2\sigma(I)$ ]                                                                                    | 0.0670, 0.1819                                                            |
| $R_1, wR_2$ (all data)                                                                                              | 0.0908, 0.2000                                                            |
| $^a R_1 = \Sigma   F_o  -  F_c   / \Sigma  F_o $ ; $wR_2 = \Sigma [w(F_o^2 - F_c^2)^2] / \Sigma [w(F_o^2)^2]^{1/2}$ |                                                                           |

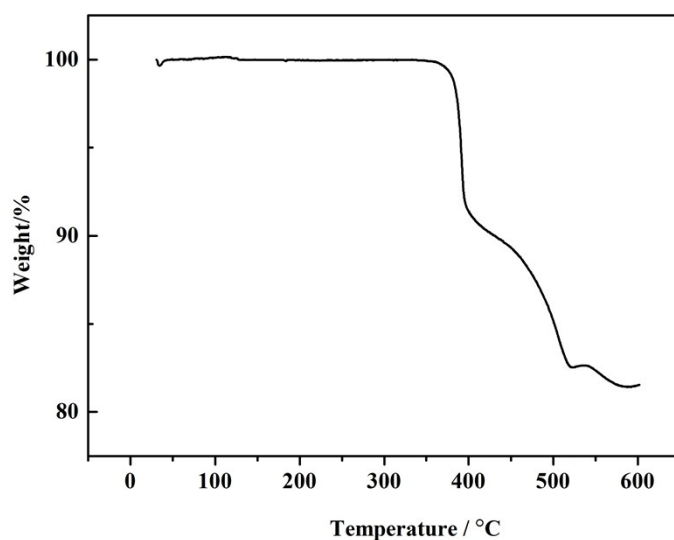

**Fig. S2** TG curve for compound 1. There is no weight loss up to 356 °C, suggesting no water molecules in the crystal structure, which is consistent the singly crystal X-ray diffraction analysis. Also, this result revealed that the inorganic-organic hybrids polyrotaxane structure exhibited commendably thermal stability. On further heating, there are three weight losses in the TG curve. The first weight loss (8.64%) from 356 to 400 °C is attributed to the loss of four Htrz organic ligands (Calcd: 8.56%). The second weight loss (8.54%) and the third weight loss (1.14%) from 400 to 580 °C corresponds to the decomposition of two 4,4-bpy molecules (Calcd: 9.63%).

### The procedure for oxidative desulfurization:

A mixture of catalyst (15  $\mu\text{mol}$ ), thiophene sulfides (80  $\mu\text{mol}$ ) and TBHP (240  $\mu\text{mol}$ ) in 2 mL  $\text{CH}_2\text{Cl}_2$  was stirred at 60  $^\circ\text{C}$ . The identity of the product was confirmed by FTIR and GC-MS, while the yield was achieved by HPLC analysis with a UV-Vis detector at  $\lambda = 254$  nm using a Inertsil SIL-100A C18 column. All analyses were obtained with the mobile phase:  $\text{CH}_3\text{CN} : \text{H}_2\text{O} = 90 : 10$  at an operating flow rate of 1  $\text{mL min}^{-1}$ .

### Scheme S1 Oxidation reaction of sulfide to corresponding sulfones.

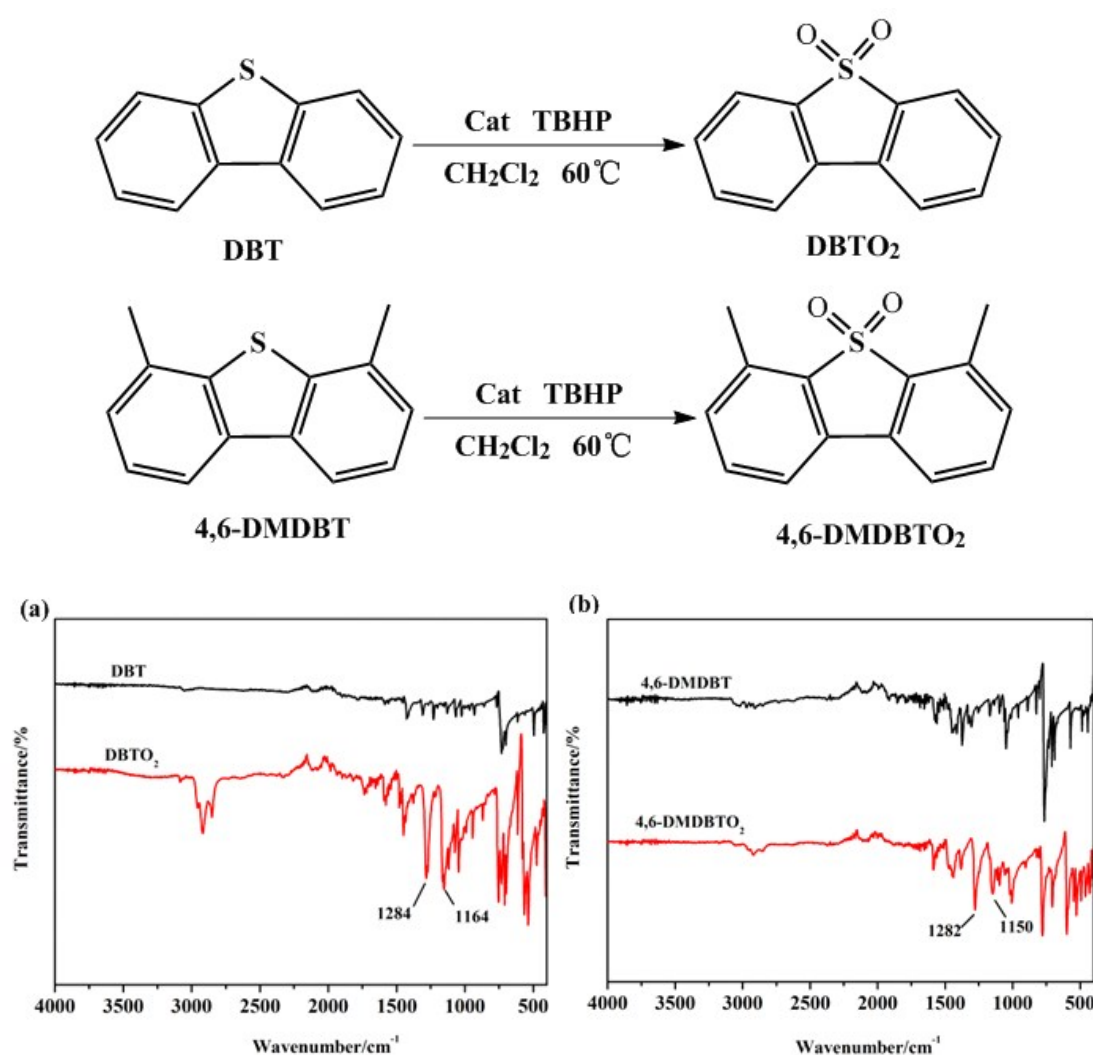

**Fig. S3** IR spectrum of DBT (a), 4,6-DMDBT (b) and the products DBTO<sub>2</sub> and 4,6-DMDBTO<sub>2</sub> after the oxidation reaction. The appearance of characteristic frequencies at 1284  $\text{cm}^{-1}$  ( $\nu_{\text{as}}, \text{SO}_2$ ) and 1164  $\text{cm}^{-1}$  ( $\nu_{\text{s}}, \text{SO}_2$ ) confirms the occurrence of sulfones in the product.

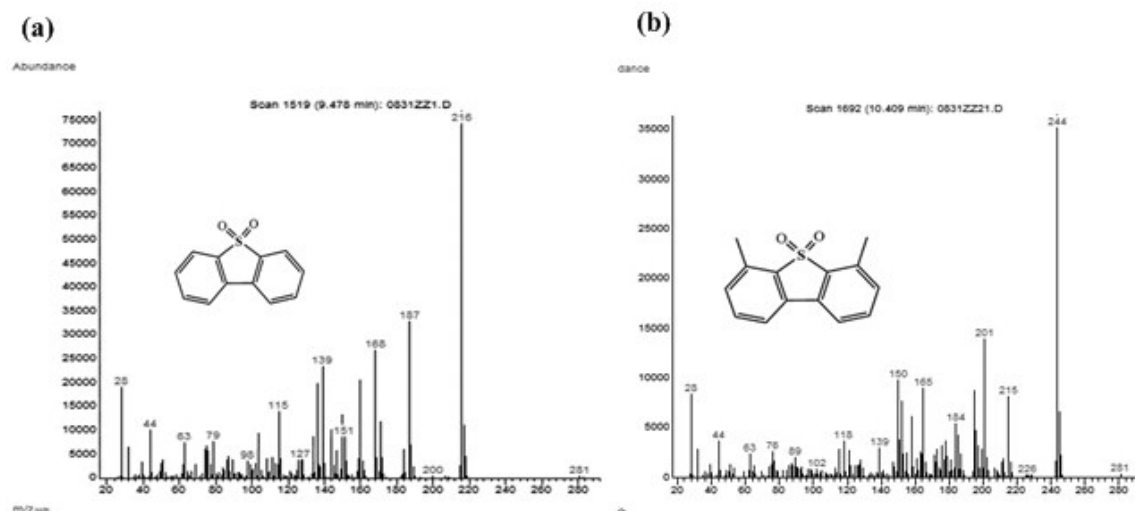

**Fig. S4.** MS spectra for the oxidation product of DBT (a) and 4,6-DMDBT (b) at 120 min and 200min, respectively.

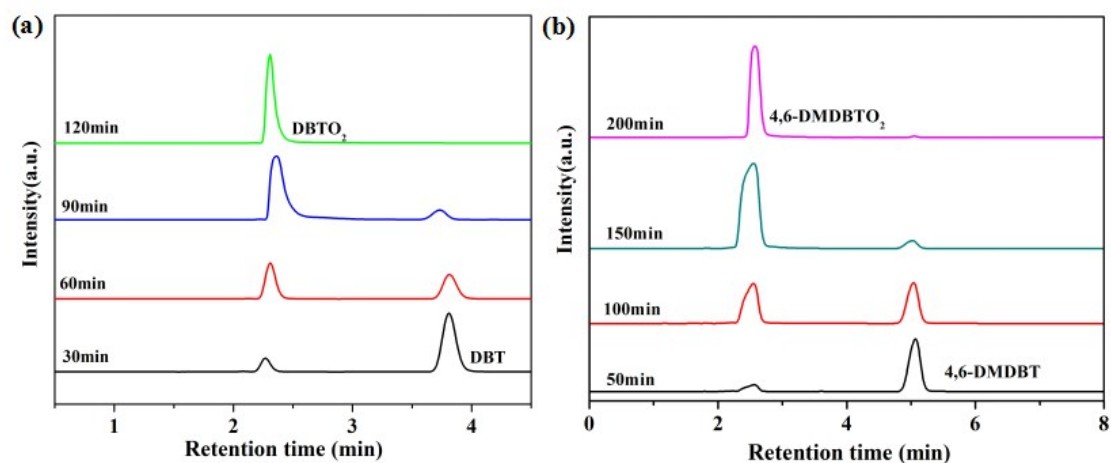

**Fig. S5** The reaction progress of DBT (a) and 4,6-DMDBT (b) was monitored over time by HPLC chromatograms in the presence of compound **1**.

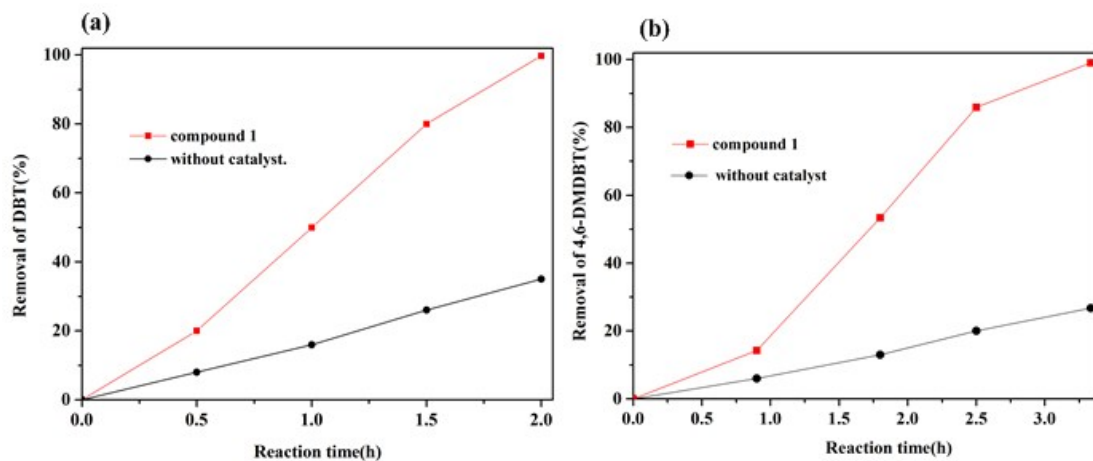

**Fig. S6** Removal of DBT (a) and 4,6-DMDBT (b) versus reaction time with the compound **1** as catalyst (■); without catalyst (●). Reaction conditions: thiophene sulfides (80  $\mu\text{mol}$ ), TBHP (240  $\mu\text{mol}$ ), catalyst (1.5  $\mu\text{mol}$ ),  $\text{CH}_2\text{Cl}_2$  (2mL) and  $T = 60^\circ\text{C}$ .

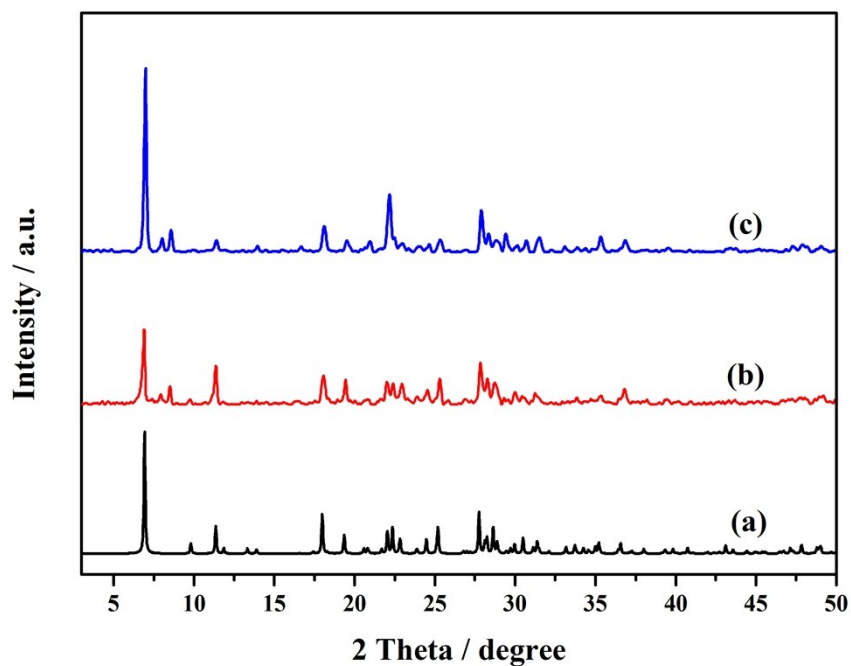

**Fig. S7** PXRD patterns of compound **1**: (a) calculated, (b) as-synthesized, (c) recovered after catalytic reaction of DBT.

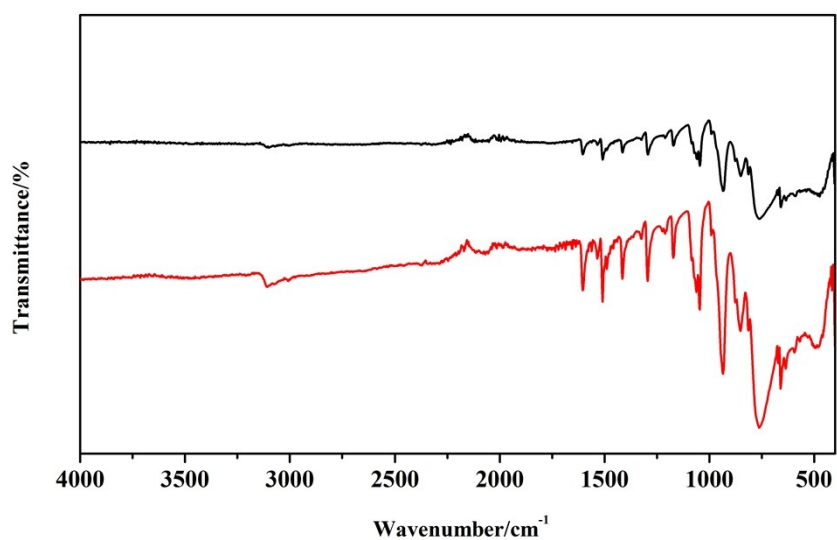

**Fig. S8** IR spectrum for as-synthesized catalyst (black line) and recovered catalyst after catalytic reaction (red line).

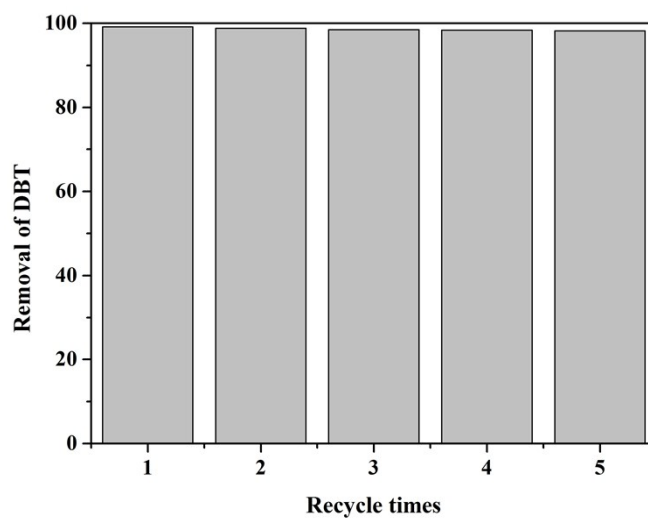

**Fig. S9** The recycle experiments for catalytic removal of DBT with **1** as the catalyst.

**Table S2** The desulfurization efficiency of polyoxometalates.

| <i>Entry</i> | <i>Substrate</i>     | <i>Catalyst</i>                                                               | <i>TBHP</i> | <i>t</i> , <i>min</i> | <i>Removal%</i> | <i>Reference</i>                                               |
|--------------|----------------------|-------------------------------------------------------------------------------|-------------|-----------------------|-----------------|----------------------------------------------------------------|
| <b>1</b>     | DBT<br>(0.08 mmol)   | Compound 1<br>(0.0015 mmol)                                                   | 0.24mmol    | 120                   | 99.8            | This work                                                      |
| <b>2</b>     | DBT<br>(0.4 mmol)    | La <sub>2</sub> MnV <sub>13</sub> O <sub>38</sub><br>(0.075 mmol)             | 2.0 mmol    | 180                   | 99.5            | <i>Chem. Commun.</i> , <b>S1</b><br><br>2013, <b>49</b> , 3673 |
| <b>3</b>     | DBT<br>(0.4 mmol)    | Co(BBPTZ) <sub>3</sub> ][HPMo <sub>12</sub> O <sub>40</sub> ]<br>(0.003 mmol) | 1.5 mmol    | 480                   | 99.16           | <i>Chem. Eur. J.</i> , <b>S2</b><br><br>2015, <b>21</b> , 3778 |
| <b>4</b>     | DMDBT<br>(0.08 mmol) | Compound 1<br>(0.0015 mmol)                                                   | 0.24mmol    | 200                   | 99.1            | This work                                                      |
| <b>5</b>     | DMDBT<br>(0.4 mmol)  | La <sub>2</sub> MnV <sub>13</sub> O <sub>38</sub><br>(0.075 mmol)             | 2.0 mmol    | 360                   | 99.1            | <i>Chem. Commun.</i> , <b>S1</b><br><br>2013, <b>49</b> , 3673 |
| <b>6</b>     | DMDBT<br>(0.4 mmol)  | Co(BBPTZ) <sub>3</sub> ][HPMo <sub>12</sub> O <sub>40</sub> ]<br>(0.003 mmol) | 1.5 mmol    | 480                   | 99.14           | <i>Chem. Eur. J.</i> , <b>S2</b><br><br>2015, <b>21</b> , 3778 |

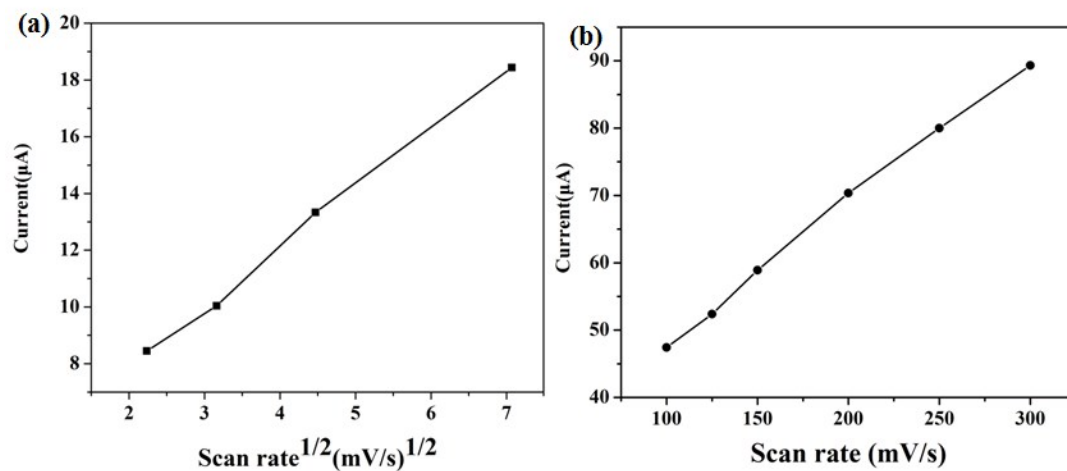

**Fig. S10** The relationship of peak currents and scan rate, (a) 5, 10, 20, 50  $\text{mV s}^{-1}$  (b) 100, 125, 150, 200, 250, 300  $\text{mV s}^{-1}$ .

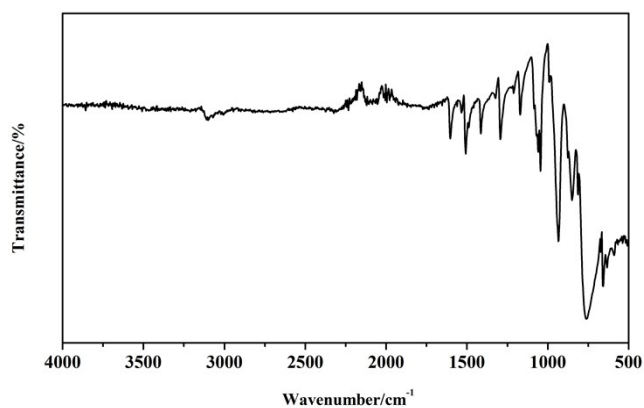

**Fig. S11** IR spectrum of compound **1**. There are four characteristic bands at 1045, 932, 876 and 814  $\text{cm}^{-1}$ , which corresponded to the characteristic asymmetric vibrations of  $\nu(\text{P-Oa})$ ,  $\nu(\text{Mo-Od})$ ,  $\nu(\text{Mo-Ob})$  and  $\nu(\text{Mo-Oc})$ . The other absorption bands at 1603, 1508, 1413, 1296, 1170, 762 and 658  $\text{cm}^{-1}$ , are attributed to characteristic peaks of the organic ligands.

## References

- S1** D. Liu, Y. Lu, H. Q. Tan, W. L. Chen, Z. M. Zhang, Y. G. Li and E. B. Wang, *Chem. Commun.*, 2013, **49**, 3673.
- S2** X. L. Hao, Y. Y. Ma, H. Y. Zang, Y. H. Wang, Y. G. Li, E. B. Wang, *Chem. Eur. J.*, 2015, **21**, 3778.
